# Supplementary material for: Water Quality Inversion of a Typical Rural Small River in Southeastern China Based on UAV Multispectral Imagery: A Comparison of Multiple Machine Learning Algorithms
Source: MDPI journal article supplement (doi:10.3390/w16040553), 2024-02-11
Supplement: s1 [file s1]

Archive with 1 entries (1 files):
- water-2788054-supplementary.pdf
