# Supplementary material for: Water Quality Inversion of a Typical Rural Small River in Southeastern China Based on UAV Multispectral Imagery: A Comparison of Multiple Machine Learning Algorithms
Source: MDPI journal article supplement (doi:10.3390/w16040553), 2024-02-11
Supplement: s1 [file s1 › water-2788054-supplementary.pdf]

## SUPPORTING INFORMATION

### Water Quality Inversion of a Typical Rural Small River in South-eastern China Based on UAV Multispectral Imagery: A Comparison of Multiple Machine Learning Algorithms

Yujie Chen<sup>1</sup>, Ke Yao<sup>1</sup>, Beibei Zhu<sup>1</sup>, Zihao Gao<sup>1</sup>, Jie Xu<sup>1</sup>, Yucheng Li<sup>1,\*</sup>, Yimin Hu<sup>2,3</sup>,  
Fei Lin<sup>2,3</sup>, Xuesheng Zhang<sup>1,4,\*</sup>

<sup>1</sup> *School of Resources and Environmental Engineering, Anhui University, Hefei  
230601, China*

<sup>2</sup> *Institute of Intelligent Machines, Hefei Institutes of Physical Science, Chinese  
Academy of Sciences, Hefei 230031, China*

<sup>3</sup> *Hefei Institutes of Collaborative Innovation for Intelligent Agriculture, Hefei  
231131, China*

<sup>4</sup> *Laboratory of Wetland Protection and Ecological Restoration, Anhui University,  
Anhui Hefei 230601, China*

**\*Author for correspondence:**

[li-yucheng@163.com](mailto:li-yucheng@163.com) (Y.-C. Li) and [zhangqing8725@163.com](mailto:zhangqing8725@163.com) (X.-S. Zhang)

## Figure legends

|                                                      |     |
|------------------------------------------------------|-----|
| Figure S1. Research schematic diagram of this study. | S-3 |
| Figure S2. Spectral curves of water sampling.        | S-3 |

## Table contents

|                                                                                         |     |
|-----------------------------------------------------------------------------------------|-----|
| Table S1. Calculation of the selected band combinations.                                | S-4 |
| Table S2. Hyperparameter settings for each model of the three water quality indicators. | S-5 |
| Table S3. Single-variable regression results of water quality parameters.               | S-6 |

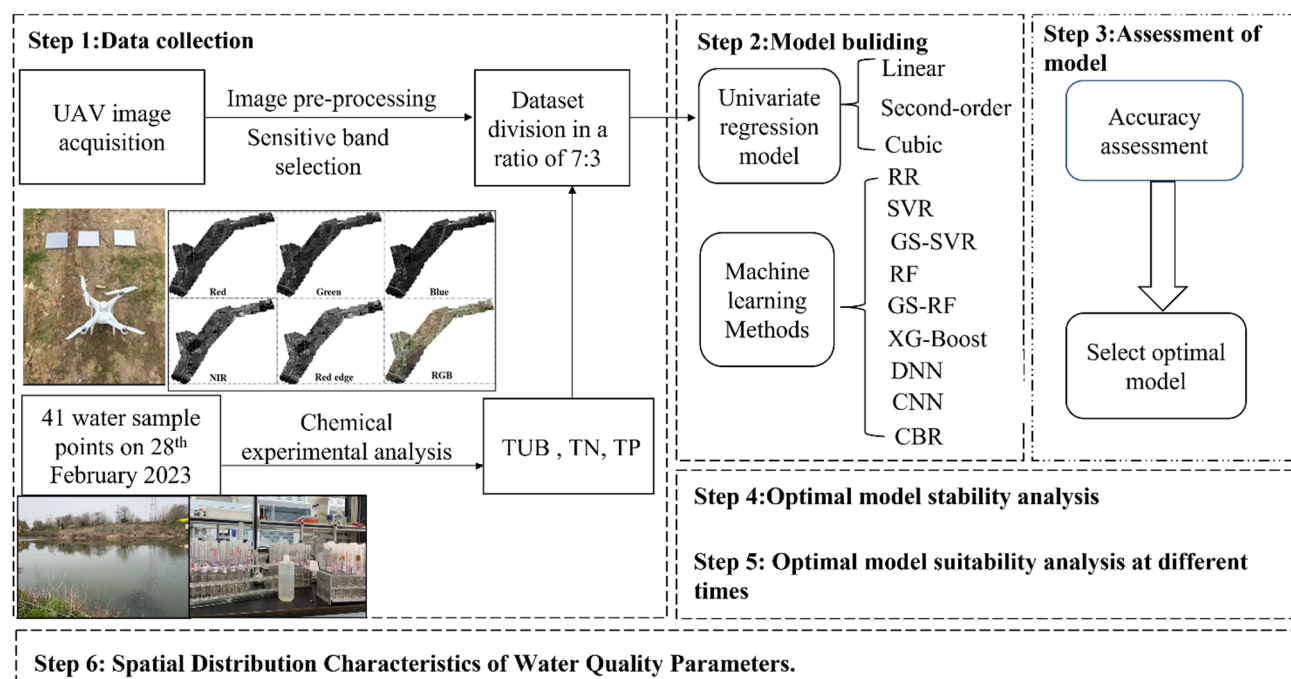

Figure S1. Research schematic diagram of this study.

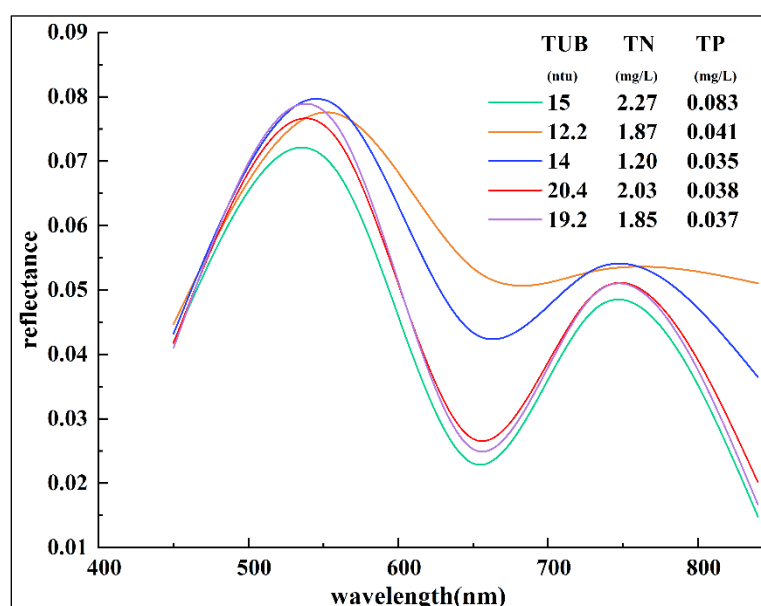

Figure S2. Spectral curves of water sampling.

**Table S1.** Calculation of the selected band combinations.

| <b>Index</b> | <b>Formula</b> | <b>Index</b> | <b>Formula</b> | <b>Index</b> | <b>Formula</b> | <b>Index</b> | <b>Formula</b>    |
|--------------|----------------|--------------|----------------|--------------|----------------|--------------|-------------------|
| V1           | B1             | V13          | B3+B4          | V25          | B4-B5          | V37          | B3/B5             |
| V2           | B2             | V14          | B3+B5          | V26          | B1/B2          | V38          | B4/B5             |
| V3           | B3             | V15          | B4+B5          | V27          | B1/B3          | V39          | $(B1+B2)/(B1-B2)$ |
| V4           | B4             | V16          | B1-B2          | V28          | B1/B4          | V40          | $(B1+B3)/(B1-B3)$ |
| V5           | B5             | V17          | B1-B3          | V29          | B1/B5          | V41          | $(B1+B4)/(B1-B4)$ |
| V6           | B1+B2          | V18          | B1-B4          | V30          | B2/B1          | V42          | $(B1+B5)/(B1-B5)$ |
| V7           | B1+B3          | V19          | B1-B5          | V31          | B2/B3          | V43          | $(B2+B3)/(B2-B3)$ |
| V8           | B1+B4          | V20          | B2-B3          | V32          | B2/B4          | V44          | $(B2+B4)/(B2-B4)$ |
| V9           | B1+B5          | V21          | B2-B4          | V33          | B2/B5          | V45          | $(B2+B5)/(B2-B5)$ |
| V10          | B2+B3          | V22          | B2-B5          | V34          | B3/B1          | V46          | $(B3+B4)/(B3-B4)$ |
| V11          | B2+B4          | V23          | B3-B4          | V35          | B3/B2          | V47          | $(B3+B5)/(B3-B5)$ |
| V12          | B2+B5          | V24          | B3-B5          | V36          | B3/B4          | V48          | $(B4+B5)/(B4-B5)$ |

Note: labels V1-V48 represent the number of each index.

**Table S2.** Hyperparameter settings for each model of the three water quality indicators.

| Indicators | Models  | Optimal Values of Hyperparameters                                                                                                                                                     |
|------------|---------|---------------------------------------------------------------------------------------------------------------------------------------------------------------------------------------|
| TUB        | RR      | $\lambda=3$ , max iter =50                                                                                                                                                            |
|            | SVR     | C=100, gamma=0.2                                                                                                                                                                      |
|            | GS-SVR  | grid search with C = {50, 100,500, 1000, 1500, 2000} gamma = {0.001, 0.01, 0.05, 0.1,0.2} obtained the optimal parameters as C = 50 and gamma=0.05.                                   |
|            | RF      | estimators =500, max feature=4                                                                                                                                                        |
|            | GS-RF   | grid search with estimators = {100, 400, 800, 1200, 1600, 2000} max feature = {1, 2, 3, 4, 5} obtained the optimal parameters as estimators = 100 and max feature = 2.                |
|            | XGBoost | max depth=2, learning rate=0.05, estimators=100, gamma=0.3                                                                                                                            |
|            | DNN     | three hidden layers are set up, the number of neurons is 100, 168, and 80; learning rate=0.05                                                                                         |
|            | CNN     | two hidden layers are set, the number of convolution kernels is 36,12; the size of the convolutional kernel=3*3, the learning rate is 0.01, and the number of iterations is 200.      |
|            | CBR     | iterations=100, learning rate=0.1, depth= 4                                                                                                                                           |
| TN         | RR      | $\lambda=7$ , max iter =20                                                                                                                                                            |
|            | SVR     | C=100, gamma=0.02                                                                                                                                                                     |
|            | GS-SVR  | grid search with C = {10,20,30,40,50,60,70} gamma = {0.001, 0.01, 0.05, 0.08,0.1} obtained the optimal parameters as estimator = 10 and gamma=0.08.                                   |
|            | RF      | estimators =500, max feature=4                                                                                                                                                        |
|            | GS-RF   | grid search with estimators = {400, 800, 1200, 1600, 2000} max feature = {1, 2, 3, 4, 5} obtained the optimal parameters as estimator = 1600 and max feature = 3.                     |
|            | XGBoost | max depth=3, learning rate=0.05, estimators=80, gamma=0.05                                                                                                                            |
|            | DNN     | three hidden layers are set up, the number of neurons is 100, 168, and 80; learning rate=0.05                                                                                         |
|            | CNN     | two hidden layers are set, the number of convolution kernels is 54,108; the size of the convolutional kernel is 3*3, the learning rate is 0.01, and the number of iterations is 100.  |
|            | CBR     | iterations=100, learning rate=0.1, depth=4                                                                                                                                            |
| TP         | RR      | $\lambda=4$ , max iter =10                                                                                                                                                            |
|            | SVR     | C=100, gamma=0.01                                                                                                                                                                     |
|            | GS-SVR  | grid search with C = {50, 100,500, 1000, 1500, 2000} gamma = {0.001, 0.01, 0.05, 0.1} obtained the optimal parameters as estimator = 50 and gamma=0.01.                               |
|            | RF      | estimators =200, max feature=4                                                                                                                                                        |
|            | GS-RF   | grid search with estimators = {100, 400, 800, 1200, 1600, 2000} max feature = {1, 2, 3, 4, 5} obtained the optimal parameters as estimator =100 and max feature =4.                   |
|            | XGBoost | max depth=3, learning rate=0.1, estimators=600, gamma=0.01                                                                                                                            |
|            | DNN     | three hidden layers are set up, the number of neurons is 100, 168, and 80; learning rate=0.01                                                                                         |
|            | CNN     | two hidden layers are set, the number of convolution kernels is 48, 108, the size of the convolutional kernel is 3*3, the learning rate is 0.01, and the number of iterations is 200. |
|            | CBR     | iterations=100, learning rate=0.1, depth=3                                                                                                                                            |

**Table S3.** Single-variable regression results of water quality parameters.

| Parameter | Index | Correlation<br>coefficient | Method       | Training set          |       | Test Set |       |       |
|-----------|-------|----------------------------|--------------|-----------------------|-------|----------|-------|-------|
|           |       |                            |              | $R^2$                 | $R^2$ | $RMSE$   | $MAE$ | $RPD$ |
| TUB       | V3    | 0.89                       | Linear       | $7.36 \times 10^{-1}$ | 0.69  | 3.16     | 2.28  | 1.79  |
|           |       |                            | Second-order | 0.74                  | 0.78  | 2.69     | 1.93  | 2.11  |
|           |       |                            | Cubic        | 0.74                  | 0.79  | 2.59     | 1.83  | 2.19  |
| TN        | V3    | -0.66                      | Linear       | $5.52 \times 10^{-1}$ | 0.17  | 0.31     | 0.24  | 1.10  |
|           |       |                            | Second-order | $5.52 \times 10^{-1}$ | 0.16  | 0.29     | 0.24  | 1.09  |
|           |       |                            | Cubic        | $5.53 \times 10^{-1}$ | 0.14  | 0.29     | 0.24  | 1.08  |
| TP        | V10   | 0.42                       | Linear       | 0.44                  | -     | 0.053    | 0.04  | -     |
|           |       |                            | Second-order | 0.51                  | -     | 0.23     | 0.10  | -     |
|           |       |                            | Cubic        | 0.52                  | 0.36  | 0.02     | 0.02  | 1.25  |

Note: "-" represents the presence of negative values of the spectral index, and thus the second and cubic polynomial models of TP could not be fitted.
